# Supplementary material for: The Anti-Tumor Effect and Underlying Apoptotic Mechanism of Ginsenoside Rk1 and Rg5 in Human Liver Cancer Cells
Source: MDPI journal article supplement (doi:10.3390/molecules26133926), 2021-06-27
Supplement: s1 [file s1]

### Supplementary materials

**Table S1.** The network topology analysis of the overlapped genes between hepatocellular carcinoma related genes and G-Rk1/G-Rg5 target proteins. Three topological indicators include degree of distribution, betweenness centrality, and closeness centrality.

| Gene     | Degree | Betweenness Centrality | Closeness Centrality |
|----------|--------|------------------------|----------------------|
| EGFR     | 197    | 0.1628901              | 0.4675723            |
| ESR2     | 180    | 0.16551558             | 0.4129257            |
| HDAC1    | 108    | 0.09374842             | 0.41614665           |
| STAT3    | 108    | 0.09763135             | 0.4279984            |
| HSP90AA1 | 91     | 0.04011796             | 0.41340566           |
| RELA     | 81     | 0.0573418              | 0.40771876           |
| ESR1     | 73     | 0.06442078             | 0.4496418            |
| MAPK14   | 73     | 0.05813376             | 0.38422758           |
| HDAC2    | 46     | 0.01026334             | 0.35626043           |
| MAPK8    | 44     | 0.0314783              | 0.37478047           |
| CDK1     | 43     | 0.02707577             | 0.37877174           |
| PPARG    | 40     | 0.01685445             | 0.36933195           |
| AURKA    | 34     | 0.01299936             | 0.35626043           |
| AURKB    | 33     | 0.01242833             | 0.33755141           |
| DNMT1    | 29     | 0.00339268             | 0.35272727           |
| MTOR     | 28     | 0.0162206              | 0.35483871           |
| PIK3CA   | 27     | 0.01041758             | 0.34013389           |
| PPARA    | 16     | 0.00533813             | 0.34530744           |
| ALDH2    | 14     | 0.00795612             | 0.27663988           |
| CYP17A1  | 14     | 0.00721384             | 0.33054523           |
| MAP2K1   | 12     | 6.42E-04               | 0.31642942           |
| HDAC3    | 11     | 0.0028698              | 0.29980332           |
| VEGFA    | 8      | 0.00299667             | 0.28628924           |
| PIK3CD   | 7      | 0.00420448             | 0.30039414           |
| FGF2     | 6      | 0.00394916             | 0.26568725           |
| MMP1     | 5      | 5.06E-04               | 0.25992692           |
| PIK3CB   | 5      | 8.00E-04               | 0.29589573           |
| NOS2     | 5      | 4.54E-04               | 0.3080254            |
| F2R      | 4      | 0.00375363             | 0.26863041           |
| PIK3CG   | 4      | 0.00208593             | 0.26562111           |
| CD274    | 3      | 0.00187441             | 0.21128713           |
| CA2      | 3      | 0.00188872             | 0.24233477           |
| TYMS     | 3      | 8.31E-05               | 0.27599586           |
| IL2      | 3      | 9.51E-06               | 0.2538059            |
| ABCB1    | 3      | 4.97E-05               | 0.25410812           |
| ACE      | 2      | 6.46E-06               | 0.25923226           |
| CA9      | 0      | 0                      | 0                    |
| MME      | 0      | 0                      | 0                    |
| LGALS9   | 0      | 0                      | 0                    |
| HPSE     | 0      | 0                      | 0                    |

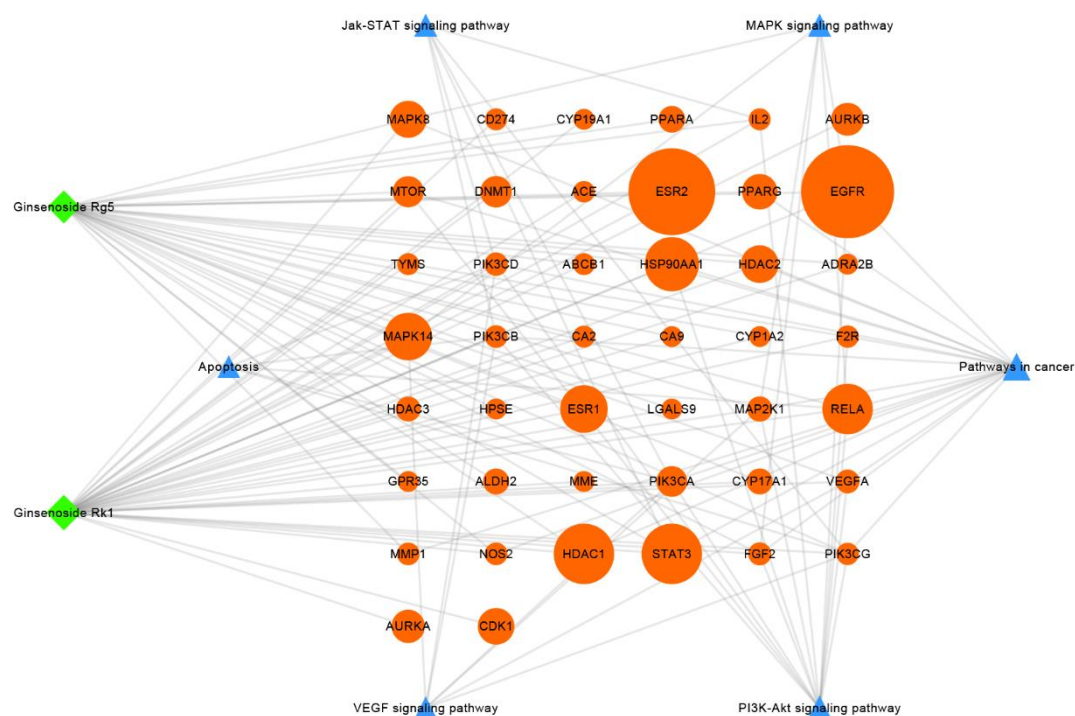

**Figure S1.** The ginsenoside-target-pathway network analysis of the overlapped genes between hepatocellular carcinoma associated genes and G-Rk1/G-Rg5 target proteins. The size of node corresponds to the degree of genes in human genome network as background.
